# Supplementary material
Source: publisher site journal article supplement (https://www.dovepress.com/article/468232)
Supplement: Supplementary file 1 [file get_supplementary_file.php]

**Supplementary Table 1** The computing method of inflammation indexes

| Variables | formula |
| --- | --- |
| **Inflammation indexes** |  |
| SII | Platelet count (10^9/L) × neutrophil count(10^9/L)/lymphocyte count (10^9/L) |
| SIRI | Neutrophil count (10^9/L) × monocyte count (10^9/L)/lymphocyte count (10^9/L) |
| NLR | Neutrophil count (10^9/L)/lymphocyte count (10^9/L) |
| MLR | Monocyte count (10^9/L)/lymphocyte count (10^9/L) |
| PLR | Platelet count (10^9/L)/lymphocyte count (10^9/L) |
| dNLR | Neutrophils count (10^9/L)/(leukocyte count (10^9/L)‐neutrophil count (10^9/L)) |
| NHR | Neutrophil count (10^9/L)/high density lipoprotein (mmol/L) |
| MHR | Monocyte count (10^9/L)/high density lipoprotein (mmol/L) |
| PHR | Platelet count (10^9/L)/high density lipoprotein (mmol/L) |
| CAR | C-reaction protein(mg/L) / serum albumin (g/L) |
| CPR | C-reaction protein (mg/L) / serum pre-albumin (mg/L) |
| CLR | C-reaction protein(mg/L)/ lymphocyte count (10^9/L) |
| ELR | Eosinophil count (10^9/L)/ lymphocyte count (10^9/L) |
| EMR | Eosinophil count (10^9/L)/ monocyte count (10^9/L) |
| ENR | Eosinophil count (10^9/L)/ neutrophil count(10^9/L) |

**Abbreviation:** SII, Systemic Inflammation Index; SIRI, Systemic Inflammatory Response Index; NLR, Neutrophil count to lymphocyte count ratio; MLR, Monocyte count to lymphocyte count ratio; PLR, Platelet count to lymphocyte count ratio; dNLR, derived neutrophil-to-lymphocyte ratio; NHR, Neutrophil count to high density lipoprotein ratio; MHR, Monocyte count to high density lipoprotein ratio; PHR, Platelet count to high density lipoprotein ratio; CAR, C-reactive protein to serum albumin ratio; CPR, C-reactive protein to serum pre-albumin ratio; CLR, C-reactive protein to lymphocyte count; ELR, Eosinophil count to lymphocyte count ratio; EMR, Eosinophil count to monocyte count ratio; ENR, Eosinophil count to neutrophil count ratio.

**Supplementary Table 2** Receiver operating characteristic analysis of SIRI, CLR, ELR and their combination before PSM.

| Variables | AUC | 95%CI | | Optimum Truncation Value | Sensitivity | Specificity | P |
| --- | --- | --- | --- | --- | --- | --- | --- |
| Lower | Upper |
| SIRI | 0.707 | 0.648 | 0.766 | 3.19 | 0.801 | 0.506 | <0.001 |
| CLR | 0.665 | 0.608 | 0.723 | 32.45 | 0.615 | 0.867 | <0.001 |
| ELR | 0.596 | 0.527 | 0.665 | 2.49 | 0.807 | 0.746 | 0.004 |
| ESR | 0.607 | 0.548 | 0.667 | 28.85 | 0.344 | 0.663 | 0.001 |
| CRP | 0.640 | 0.582 | 0.698 | 24.20 | 0.500 | 0.373 | <0.001 |

**Abbreviation:** PSM**,** Propensity Score Matching; SIRI, Systemic Inflammatory Response Index; CLR, C-reactive protein to lymphocyte count; ELR, Eosinophil count to lymphocyte count ratio; ESR, erythrocyte sedimentation rate; CRP, C-reactive protein.

**Supplementary Table 3** Receiver operating characteristic analysis of SIRI, CLR, ELR and their combination after PSM.

| Variables | AUC | 95%CI | | Optimum Truncation Value | Sensitivity | Specificity | P |
| --- | --- | --- | --- | --- | --- | --- | --- |
| Lower | Upper |
| SIRI | 0.668 | 0.578 | 0.757 | 3.38 | 0.783 | 0.493 | 0.001 |
| CLR | 0.601 | 0.507 | 0.696 | 30.70 | 0.304 | 0.841 | 0.040 |
| ELR | 0.564 | 0.469 | 0.660 | - | - | - | 0.192 |
| ESR | 0.540 | 0.443 | 0.637 | - | - | - | 0.415 |
| CRP | 0.608 | 0.515 | 0.702 | 24.20 | 0.768 | 0.420 | 0.028 |

**Abbreviation:** PSM**,** Propensity Score Matching; SIRI, Systemic Inflammatory Response Index; CLR, C-reactive protein to lymphocyte count; ELR, Eosinophil count to lymphocyte count ratio; ESR, erythrocyte sedimentation rate; CRP, C-reactive protein.
